# Supplementary material for: Microwave assisted synthesis of ZnIn2S4 nanoparticles: effect of power variation for photoresponse and optoelectronic applications
Source: Royal Society of Chemistry journal article supplement (doi:10.1039/d4dt01724b), 2024-01-01
Supplement: d4dt01724b1.pdf [file d4dt01724b1.pdf]

## Supporting Information

### **Microwave Assisted Synthesis of ZnIn<sub>2</sub>S<sub>4</sub> Nanoparticles: Effect of Power Variation for Photo Response and Optoelectronic Applications**

Priyanka Priyadarshini<sup>1\*</sup>, Swasti Padma Panda<sup>2</sup>, Abinash Parida<sup>1</sup>, Ramakanta Naik<sup>1\*</sup>

<sup>1</sup>*Institute of Chemical Technology, Indian Oil Odisha Campus, Bhubaneswar, 751013, India*

<sup>2</sup>*Department of Chemistry, School of Applied Science, KIIT Deemed to be University,  
Bhubaneswar, 751024, India*

\*Corresponding author: [priyanka.priyadarshini2019iocb@gmail.com](mailto:priyanka.priyadarshini2019iocb@gmail.com); [ramakanta.naik@gmail.com](mailto:ramakanta.naik@gmail.com)

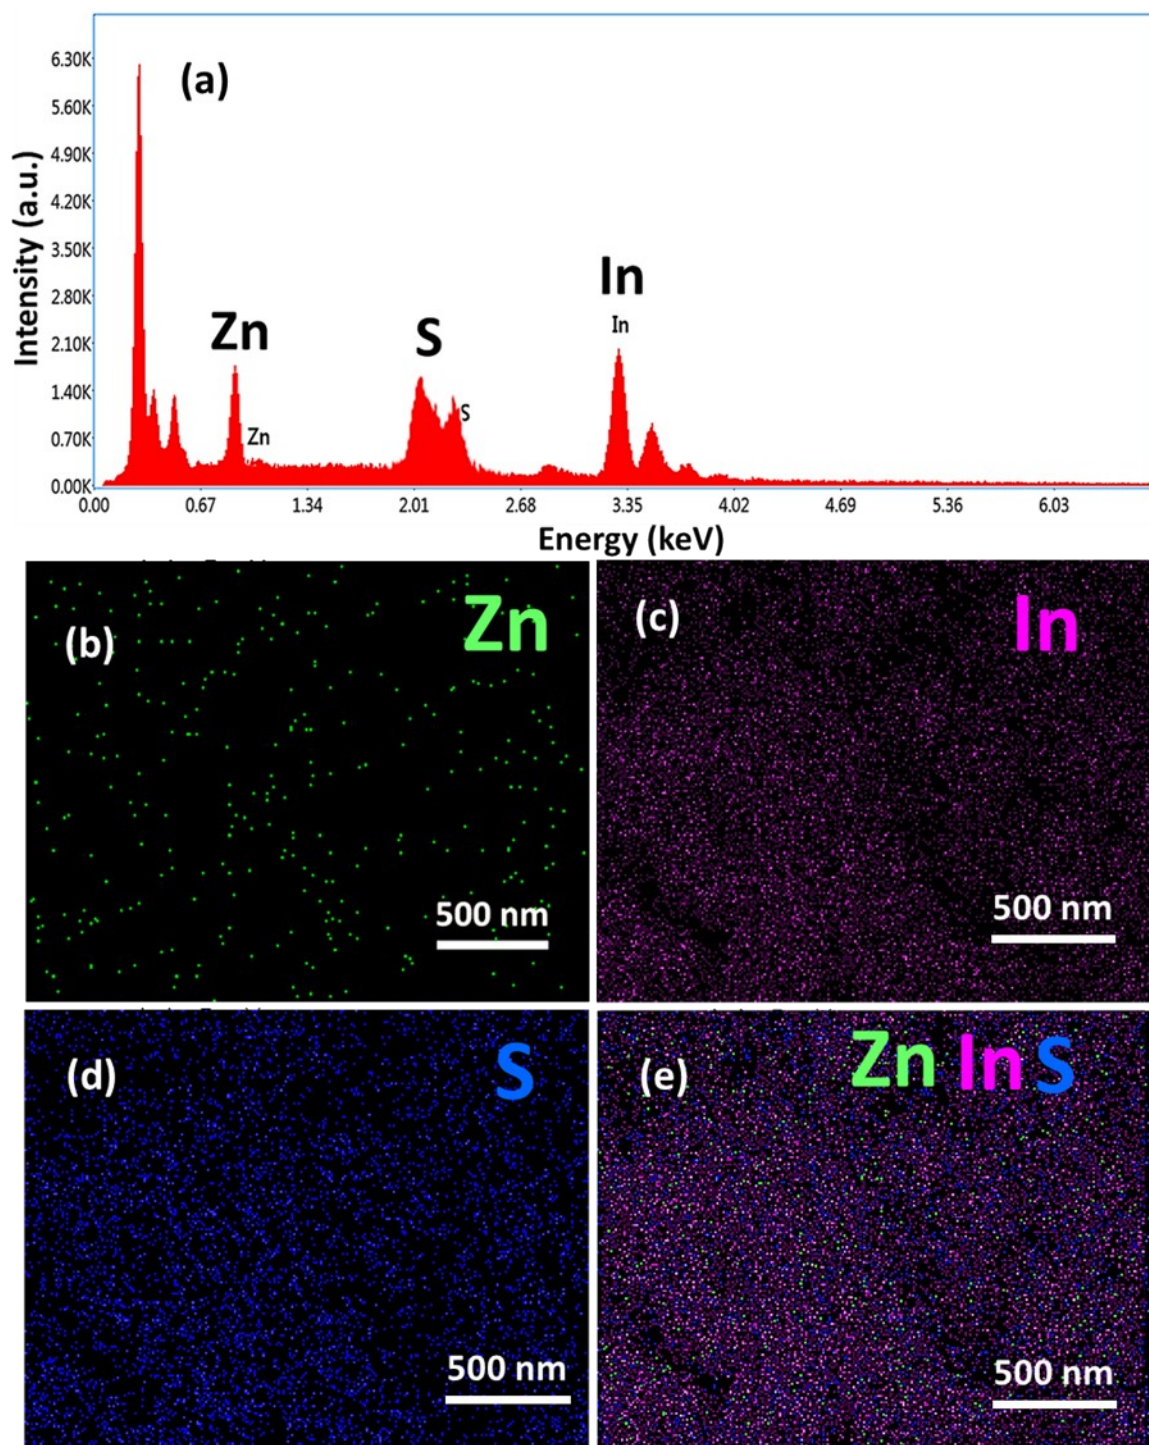

**Fig. S1.** (a) EDX spectrum, (b-e) corresponding individual elemental mapping of Zn, In, and S of repeated ZIS- 540 W nanoparticles.

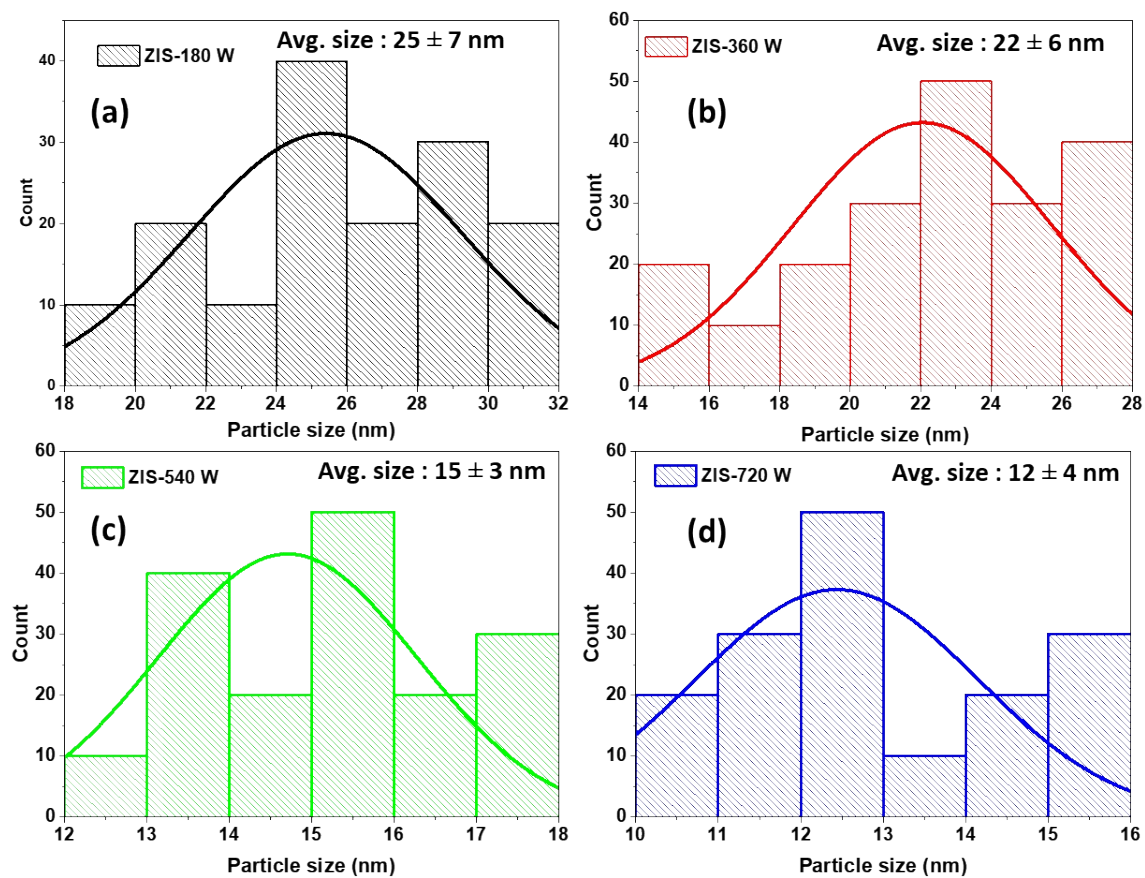

**Fig. S2.** Particle size histogram of (a) ZIS-180 W, (b) ZIS-360 W, (c) ZIS-540 W, and (d) ZIS-720 W samples.

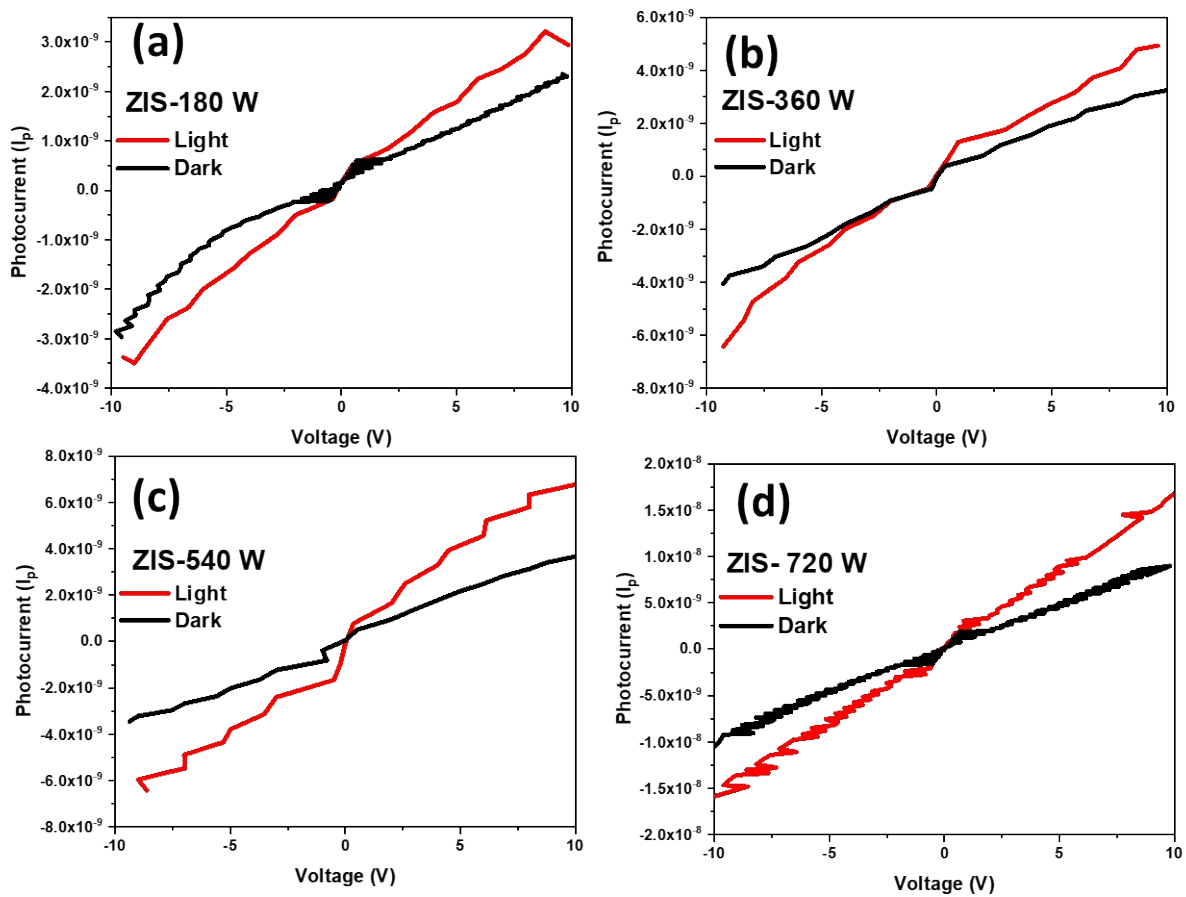

**Fig. S3.** Variation of individual photocurrent of (a) ZIS-180 W, (b) ZIS-360 W, (c) ZIS-540 W, and (d) ZIS-720 W, samples under light and dark conditions.

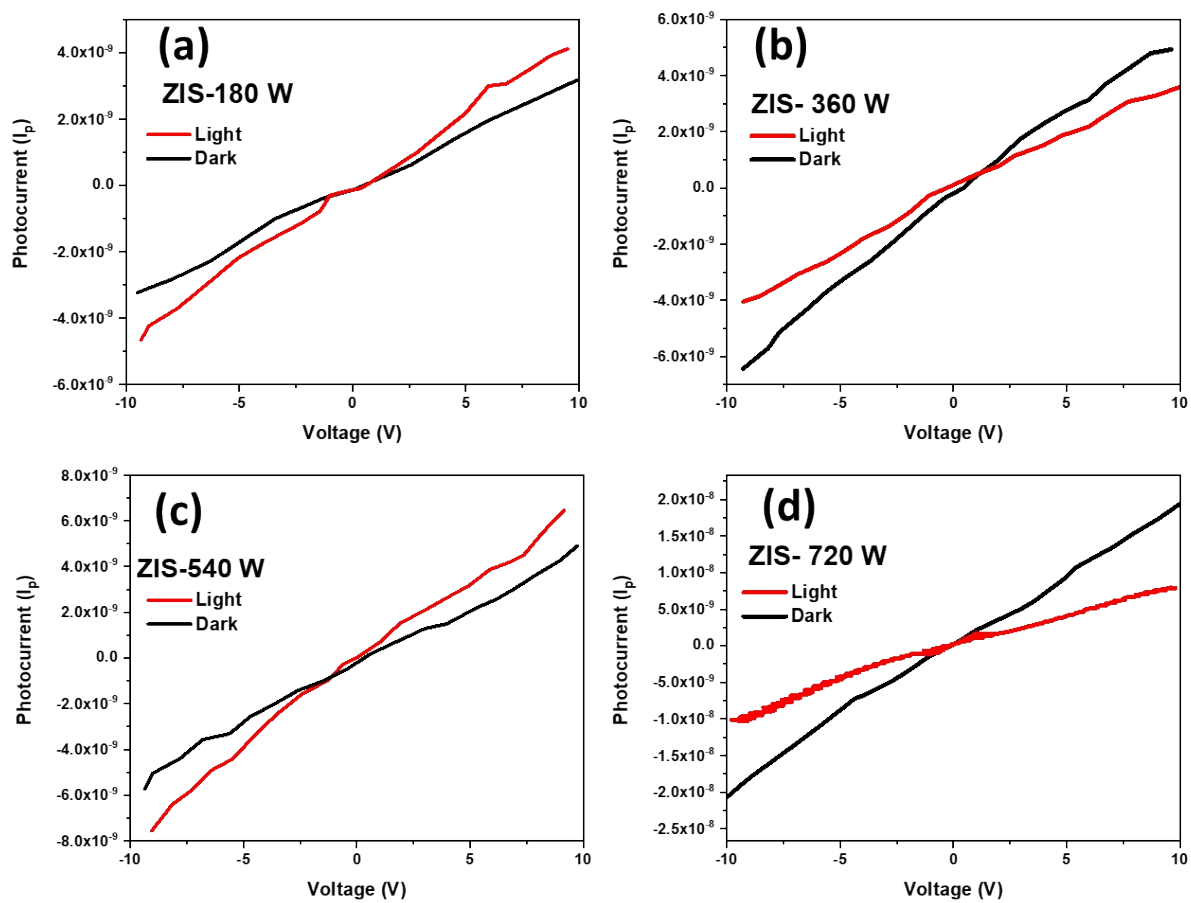

**Fig. S4.** Variation of individual photocurrent of (a) ZIS-180W, (b) ZIS-360W, (c) ZIS-540W, and (d) ZIS-720W repeated samples after 4 hrs annealing under light and dark conditions.

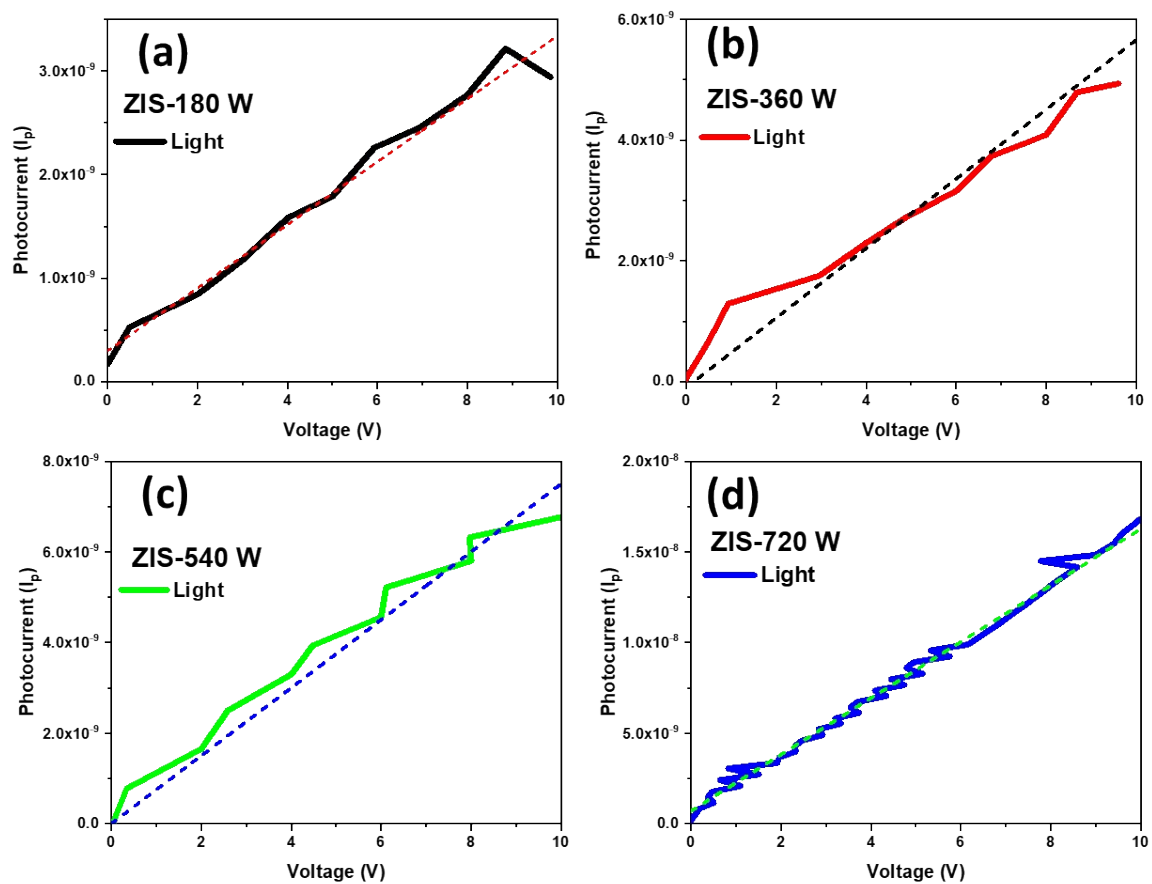

**Fig. S5.** Evaluation of resistance of (a) ZIS-180W, (b) ZIS-360W, (c) ZIS-540W, and (d) ZIS-720W, samples in the light condition.

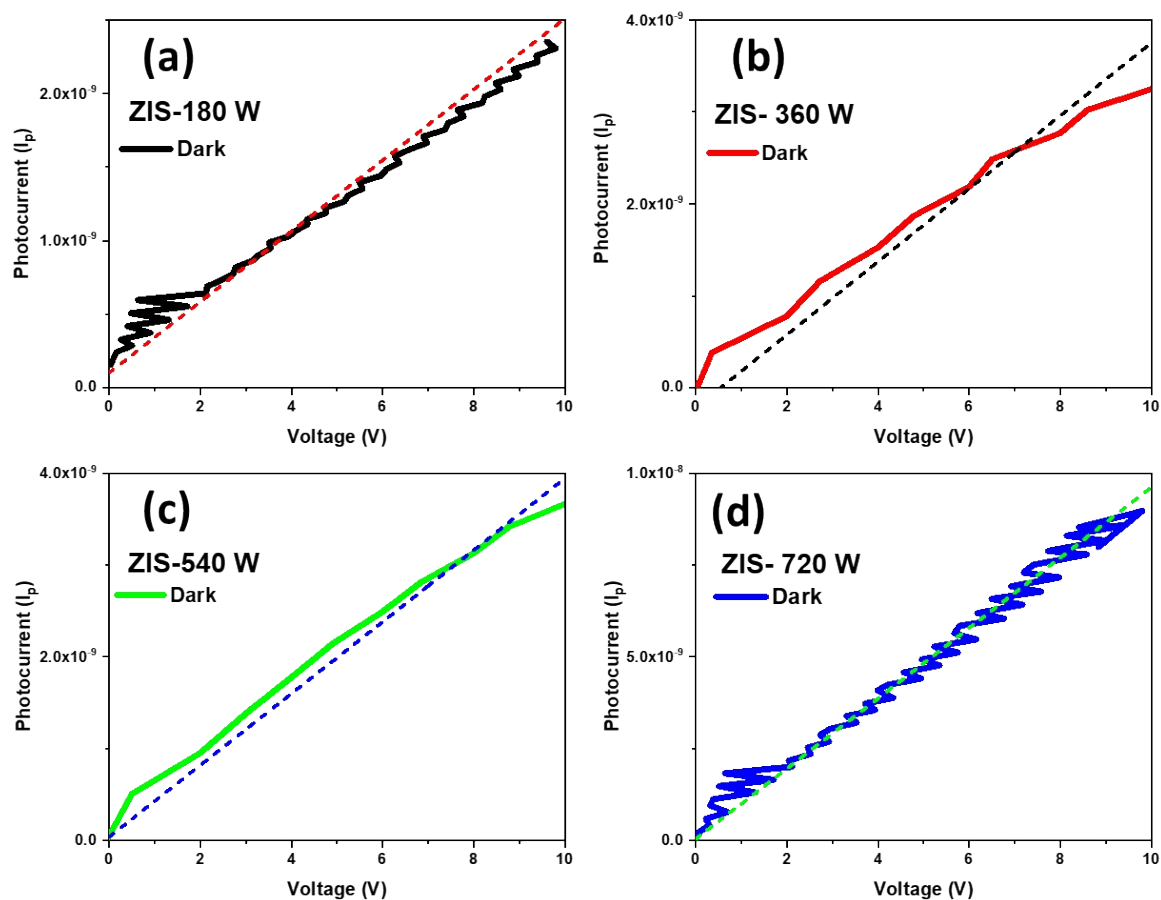

**Fig. S6.** Evaluation of resistance of (a) ZIS-180 W, (b) ZIS-360 W, (c) ZIS-540 W, and (d) ZIS-720 W, samples in the dark condition.
